# Supplementary material
Source: PubMed Central journal article supplement (PMC5040507)
Supplement: NIHMS69894-supplement-Appendix_3.pdf [file NIHMS69894-supplement-Appendix_3.pdf]

## Appendix 3: Original Data Matrix

| Num | Reference                                                                                                                                                   | Year | Journal                                | Data year | Continent | Region | Country         | Climate |
|-----|-------------------------------------------------------------------------------------------------------------------------------------------------------------|------|----------------------------------------|-----------|-----------|--------|-----------------|---------|
| 1   | K. S. (2011). Local perceptions of climate                                                                                                                  | 2011 | Biology Letters Regional               | .         | 3         | 303    | India, Nepal    | 50      |
| 2   | Scheffran, J. (2014). Byg, A.; Salick, J.(2009). <i>Local perspectives on a</i>                                                                             | 2014 | Environmental                          | 2012      | 3         | 303    | Pakistan        | 50      |
| 3   | Josni, S.; Jasra, W.A.; Ismail, M.; Shrestha, R.                                                                                                            | 2009 | Global Environmental Change            | 2006      | 3         | 304    | China           | 50      |
| 4   | M.; Yi, S. L.; Wu, N. Kai, J. K. (2010). <i>Global and Local</i>                                                                                            | 2013 | Environmental Management               | 2009      | 3         | 303    | Pakistan        | 50; 20  |
| 5   | veuwah, N. (2000). <i>Culture, Climate and</i>                                                                                                              | 2010 | Sociology and Anthropology             | 2009      | 3         | 303    | Nepal           | 50      |
| 7   | R. E. (2001). <i>Climate</i>                                                                                                                                | 2006 | Anthropology                           | 2000,     | 3         | 303    | India           | .       |
| 8   | (2004). <i>Hunting for</i>                                                                                                                                  | 2001 | Climate Research                       | .         | 3         | 303    | India           | 50      |
| 9   | Huntington, O. H.; Cruikshank, J. (2001). <i>Glaciers and Climate</i>                                                                                       | 2004 | Ecological Economics                   | 1996,     | 4         | 801    | Canada          | 50      |
| 10  | Duerden, F. (2004). <i>Translating Climate</i>                                                                                                              | 2013 | Climatic Change                        | .         | 4         | 801    | USA             | 50      |
| 11  | Shulski, M. D. (2011). <i>Anatomy of a closing</i>                                                                                                          | 2011 | Arctic                                 | .         | 4         | 801    | Canada, USA     | 50      |
| 12  | Pearce, I. D.; Ford, J. D.; Laidler, G. J.; Smit, B.; Ford, J. D.; Smit, B.; Wandel, J. (2006). <i>Global Environmental Change</i>                          | 2004 | Arctic                                 | .         | 4         | 801    | Canada          | 50      |
| 13  | Pearce, I. D.; Ford, J. D.; Laidler, G. J.; Smit, B.; Ford, J. D.; Smit, B.; Wandel, J. (2006). <i>Global Environmental Change</i>                          | 2011 | Global Environmental Change            | 2000-2008 | 4         | 801    | USA             | 50      |
| 14  | D.; Laidler, G. J.; Smit, B.; Ford, J. D.; Smit, B.; Wandel, J. (2006). <i>Global Environmental Change</i>                                                  | 2009 | Polar Research                         | 2006      | 4         | 801    | Canada          | 50      |
| 15  | Wandel, J. (2006). <i>Global Environmental Change</i>                                                                                                       | 2006 | Change                                 | 2004,2    | 4         | 801    | Canada          | 50      |
| 16  | Wandel, J.; MacDonald, Smit, B.; Wandel, J.; Allurut, M.; Shappa, K.; Wandel, J.; Allurut, M.; Shappa, K.; Iltusarjuat, S. (2008). <i>Dangerous climate</i> | 2006 | Polar record                           | .         | 4         | 801    | Canada          | 50      |
| 17  | Smit, B.; Wandel, J.; Allurut, M.; Shappa, K.; Iltusarjuat, S. (2008). <i>Dangerous climate</i>                                                             | 2007 | Arctic                                 | 2004,2    | 4         | 801    | Canada          | 50      |
| 18  | Gearheard, S.; Matumeak, W.; Pocernich, M.; Stewart, R.; Sanguya, J.; Laidler, G. J. (2000). <i>Inuit and scientific</i>                                    | 2008 | The Geographical Journal               | 2004,2    | 4         | 801    | Canada, Canada, | 50      |
| 19  | Gearheard, S.; Matumeak, W.; Pocernich, M.; Stewart, R.; Sanguya, J.; Laidler, G. J. (2000). <i>Inuit and scientific</i>                                    | 2009 | Research Letters                       | .         | 4         | 801    | USA             | 50      |
| 20  | Gearheard, S.; Matumeak, W.; Pocernich, M.; Stewart, R.; Sanguya, J.; Laidler, G. J. (2000). <i>Inuit and scientific</i>                                    | 2006 | Ambio                                  | 2004      | 4         | 801    | USA, Canada     | 50      |
| 21  | Gearheard, S.; Matumeak, W.; Pocernich, M.; Stewart, R.; Sanguya, J.; Laidler, G. J. (2000). <i>Inuit and scientific</i>                                    | 2009 | Climatic Change                        | 2000-2004 | 4         | 801    | Canada          | 50      |
| 22  | Gearheard, S.; Matumeak, W.; Pocernich, M.; Stewart, R.; Sanguya, J.; Laidler, G. J. (2000). <i>Inuit and scientific</i>                                    | 2006 | Climatic Change                        | .         | 4         | 801    | Canada          | 50      |
| 23  | Gearheard, S.; Matumeak, W.; Pocernich, M.; Stewart, R.; Sanguya, J.; Laidler, G. J. (2000). <i>Inuit and scientific</i>                                    | 2006 | Ecological Economics                   | 2004      | 4         | 801    | Canada          | 50      |
| 24  | Gearheard, S.; Barry, R.G. (2010). <i>Changes</i>                                                                                                           | 2010 | Global Environmental Change            | 2001      | 4         | 801    | Canada          | 50      |
| 25  | Alessa, L.; Kliskey, A.; Williams, P.; Barton, M. C. J.; Hinkel, K. M.; Roturier, S.; Roue, M. (2009). <i>Of forest, snow</i>                               | 2008 | Global Environmental Change            | 2004-2006 | 4         | 801    | USA             | 50      |
| 26  | C. J.; Hinkel, K. M.; Roturier, S.; Roue, M. (2009). <i>Of forest, snow</i>                                                                                 | 2009 | Arctic                                 | 2006      | 4         | 801    | USA             | 50      |
| 27  | (2009). <i>Of forest, snow</i>                                                                                                                              | 2009 | Forest Ecology and Management          | 2008,2    | 2         | 801    | Sweden          | 50      |
| 28  | Tyler, N. J. C.; Tur, J. M.; Sundset, M. A.; Forbes, B. C.; Stammler, F.; Kumpula,                                                                          | 2007 | Change                                 | .         | 2         | 801    | Norway          | 50      |
| 29  | Stammler, F.; Kumpula,                                                                                                                                      | 2009 | Proceedings of the National Academy of | 2004-2008 | 3         | 801    | Russia          | 50      |

## Data\_Matrix

|    |                                                                                                       |      |                                 |                 |   |     |                  |    |
|----|-------------------------------------------------------------------------------------------------------|------|---------------------------------|-----------------|---|-----|------------------|----|
| 30 | Kumpula, I.; Forbes, B. C.; Stammler, F.                                                              | 2010 | Arctic                          | 2004,2<br>1998- | 3 | 801 | Russia           | 50 |
| 31 | Kumpula, I.; Forbes, B. C.; Stammler, F.; Meschtyb, N. (2012).                                        | 2012 | Remote Sensing                  | 2004-           | 3 | 801 | Russia           | 50 |
| 32 | Boisjerie, M.; Locantore, B.; Sheil, D.; Padmanaba, M.; Combest-Friedman, C.; Christie, P.; Miles, E. | 2013 | Ecology and society             | .               | 3 | 302 | Indonesia        | 10 |
| 33 | (2012). <i>Household</i>                                                                              | 2012 | Management                      | 2009            | 3 | 302 | Philippines      | 10 |
| 34 | Su, G. S.; Macawile, J.; Villarino, A.; Agapito, J.; Gomez, N. (2011).                                | 2011 | Environmental Research          | .               | 3 | 302 | Philippines      | 10 |
| 35 | Buys, L.; Miller, E.; van Meegen, K. (2012)                                                           | 2012 | Environmental Change            | .               | 6 | 601 | Australia        | 30 |
| 36 | <i>Conceptualising climate</i>                                                                        | 2012 | Change                          | 2007-           | 6 | 601 | Australia        | 10 |
| 37 | Green, D.; Billy, J.; Tapim, A. (2010).                                                               | 2010 | Climatic Change                 | 2009            | 6 | 601 | Australia        | 10 |
| 38 | K. K.; Campbell, B. M.; S.; Robinson, G.                                                              | 2010 | Change                          | 2010            | 6 | 601 | Australia        | 10 |
| 39 | (2012). <i>Pastoralists'</i>                                                                          | 2012 | Environmental Management        | .               | 6 | 601 | Australia        | 20 |
| 40 | Drages, R. V.; McClatchey, W. C.                                                                      | 2009 | Global Environmental Change     | 2001-           | 6 | 603 | Marshall         | 10 |
| 41 | (2009). <i>Living on the</i>                                                                          | 2009 | Change                          | 2002            | 6 | 603 | Marshall         | 10 |
| 42 | (2010). <i>Indigenous Knowledge and Long-</i>                                                         | 2010 | Environmental Management        | 2008            | 6 | 603 | Solomon Islands  | 10 |
| 43 | Rudiak-Gould, P.                                                                                      | 2012 | Global Environmental Change     | 2007,2          | 6 | 603 | Marshall Islands | 10 |
| 44 | (2012). <i>Promiscuous</i>                                                                            | 2012 | Change                          | 2004,           | 6 | 603 | Marshall Islands | 10 |
| 45 | (2014). <i>The Influence of Science</i>                                                               | 2014 | Human Ecology                   | 2007,           | 6 | 603 | Marshall Islands | 10 |
| 46 | (2009). <i>"It's so different today": Climate change</i>                                              | 2009 | Global Environmental Change     | 2001-           | 4 | 401 | Canada           | 40 |
| 47 | Li, C., Ding, Z., Kasaliy, R. G. (2010). <i>Farmer's Adaptation to Climate</i>                        | 2010 | Procedia                        | .               | 3 | 304 | China            | 30 |
| 48 | Ho, P.; Azadi, H.                                                                                     | 2010 | Environmental Research          | .               | 3 | 304 | China            | 30 |
| 49 | (2010). <i>Rangeland degradation in North</i>                                                         | 2010 | Research                        | .               | 3 | 304 | China            | 30 |
| 50 | Baivaland, B.; Fernández-Giménez, M. E. (2012).                                                       | 2012 | Nomadic Peoples                 | 2008-           | 3 | 304 | Mongolia         | 20 |
| 51 | under storms: <i>Contributions of</i>                                                                 | 2010 | Global Environmental Change     | 2006-           | 3 | 304 | Mongolia         | 20 |
| 52 | K. D.; Kirschke, D.; Franke, C.; Sieber, S.; Siebert, R.; Tscherning, Bryan, E.; Deressa, T.          | 2012 | Global Environmental Change     | 2009;           | 1 | 104 | Tanzania         | 10 |
| 53 | T.; Gbetibouo, G. A.; Bryan, E.; Deressa, T.                                                          | 2009 | Science & Policy                | 2005            | 1 | 106 | South Africa     | 20 |
| 54 | T.; Gbetibouo, G. A.; R. M.; Ringler, C.; Alemu, T.; Yusuf, M.                                        | 2009 | Science & Policy                | 2005            | 1 | 107 | Ethiopia         | 20 |
| 55 | (2009). <i>Rangeland degradation in North</i>                                                         | 2009 | Global Environmental Change     | 2004-           | 1 | 107 | Ethiopia         | 10 |
| 56 | Hassan, R. M.; Ringler, C. (2010). <i>Perception of</i>                                               | 2010 | Journal of Agricultural Science | 2004-           | 1 | 107 | Ethiopia         | 10 |
| 57 | K. W.; Ogindo, H. O.                                                                                  | 2009 | Acta Geologica Sinica           | .               | 1 | 104 | Kenya            | 20 |
| 58 | (2009) <i>Climate Change</i>                                                                          | 2009 | Acta Geologica Sinica           | .               | 1 | 104 | Kenya            | 20 |

|    |                                                                                                      |      |                                                   |                  |   |     |                              |    |
|----|------------------------------------------------------------------------------------------------------|------|---------------------------------------------------|------------------|---|-----|------------------------------|----|
| 54 | Kansiime, M. K.; Wambugu, S. K.; Nassarwan, A.; Snyman, H.A.; Smit, G.N. (2008).                     | 2013 | Journal of Natural Sciences Research              | 2011             | 1 | 104 | Uganda                       | 10 |
| 55 | B.; Liwenga, E. T.; Meze-Hausken, E. (2004). <i>Contrasting</i>                                      | 2008 | Journal of Arid Environments                      | 2005             | 1 | 107 | Ethiopia                     | 20 |
| 56 | Orlove, B.; Koricich, C.; Kabugo, M.; Majugu, A.                                                     | 2013 | Journal of Geography and Regional Planning        | 1999;            | 1 | 104 | Tanzania                     | 10 |
| 57 | (2004). <i>Contrasting</i>                                                                           | 2004 | Climate Research                                  | 2002             | 1 | 107 | Ethiopia                     | 20 |
| 58 | Orlove, B.; Koricich, C.; Kabugo, M.; Majugu, A.                                                     | 2010 | Climatic Change                                   | 2005-            | 1 | 104 | Uganda                       | 10 |
| 59 | <i>Livelihoods, vulnerability and</i>                                                                | 2008 | Environmental Science & Policy                    | Journal of       | 1 | 104 | Tanzania                     | 10 |
| 60 | Snyman, H.A.; Smit, G.N. (2007). <i>Cattle-</i>                                                      | 2007 | Environmental Management                          | 2001             | 1 | 107 | Ethiopia                     | 20 |
| 61 | Ishaya, S.; Abaje, I. B. (2008). <i>Indigenous people's perception on</i>                            | 2008 | Journal of Geography and Regional Planning        | 2008             | 1 | 102 | Nigeria                      | 20 |
| 62 | Dwamena, E.; Bart-                                                                                   | 2011 | Agricultural and                                  | .                | 1 | 103 | Ghana                        | 10 |
| 63 | Assessment of species composition change in                                                          | 1998 | Biodiversity and Conservation                     | 1991-            | 1 | 103 | Senegal                      | 10 |
| 64 | Lyons, P. M. (2009). <i>Local perceptions of vegetation change and</i>                               | 2000 | Environmental Management                          | 1991-            | 1 | 103 | Senegal                      | 10 |
| 65 | Reenberg, A. (2010). <i>Cultural barriers to</i>                                                     | 2010 | Global Environmental Change                       | 2007-            | 1 | 102 | Burkina Faso                 | 20 |
| 66 | Sop, I. K.; Oideiland, J. (2011). <i>Local Perceptions of Woody</i>                                  | 2011 | Land Degradation & Development                    | .                | 1 | 102 | Burkina Faso                 | 20 |
| 67 | West, C. T.; Koricich, C.; Ouattara, F. (2008). <i>Local Perceptions and</i>                         | 2008 | Land Degradation & Development                    | 1889-            | 1 | 102 | Burkina Faso                 | 20 |
| 68 | (2006). <i>Woody vegetation change in Sahelian West Africa:</i>                                      | 2006 | Environment, Development and Sustainability       | 2004             | 1 | 102 | Burkina Faso, Niger, Senegal | 20 |
| 69 | Chambers, N.; Fabricius, C. (2007). <i>Expert and Generalist</i>                                     | 2007 | Ecology and Society                               | .                | 1 | 106 | South Africa                 | 40 |
| 70 | Klintonberg, P. ; Seely, M.; Christiansson, C. (2007). <i>Local and</i>                              | 2007 | Journal of Arid Environments                      | 2003, 2004, 2005 | 1 | 106 | Namibia                      | 20 |
| 71 | C.; Adger, W. N.; Thomas, D. S. G. (2008). <i>Effective</i>                                          | 2008 | Geoforum                                          | 2003-            | 1 | 106 | Mozambique                   | 20 |
| 72 | (2008). <i>Perceptions of climate risk in</i>                                                        | 2008 | Global Environmental Change                       | 2006             | 1 | 106 | Mozambique                   | 20 |
| 73 | Boulat, S.; Berkes, F. (2013). <i>Perception and Interpretation of</i>                               | 2013 | Ecology and Society                               | 2006, 2011       | 5 | 501 | Bolivia                      | 50 |
| 74 | Madagascar, M.; Brown, K. (2000). <i>Colonist farmers' perceptions of fertility and the frontier</i> | 2000 | Agriculture and Human Values                      | .                | 5 | 502 | Brazilia                     | 10 |
| 75 | Oldekop, J. A.; Bebbington, A. J.; Truelove, N. K.;                                                  | 2012 | Human Ecology                                     | 2008, 2009, 2010 | 5 | 502 | Ecuador                      | 10 |
| 76 | Christiansson, C.; Fonseca, M. G.; Doblas, J.;                                                       | 2013 | Philosophical Transactions of the Royal Society B | 2007             | 5 | 502 | Brazilia                     | 10 |

Data\_Matrix

|     |                                                                                                                                                                                                   |      |                                                             |       |   |     |                 |    |
|-----|---------------------------------------------------------------------------------------------------------------------------------------------------------------------------------------------------|------|-------------------------------------------------------------|-------|---|-----|-----------------|----|
| 77  | Gilles, J. L.; García, M.; Jiménez, E.; Cusicanqui, J.; Navia, Pitcher, T.J.; Rotinsulu, C. (2008). <i>Evidence of fishery depletions and</i>                                                     | 2010 | Annals of the Association of American Geographers           | 2006  | 5 | 501 | Bolivia         | 50 |
| 78  | Bunce, M.; Rodwell, L. D.; Gibb, R.; Mee, L. (2008). <i>Shifting</i>                                                                                                                              | 2008 | Biological Conservation                                     | 2006  | 3 | 302 | Indonesia       | 10 |
| 79  | Alam, S. I.; Khan, M. A. S. A. (2012). <i>Climate</i>                                                                                                                                             | 2008 | Ocean & Coastal Management                                  | 2006  | 1 | 107 | Mauritius       | 10 |
| 80  | Owusu, G.; Burkett, V. (2014). <i>Perception,</i>                                                                                                                                                 | 2012 | Mitigation and Adaptation Strategies                        |       | 3 | 303 | Bangladesh      | 10 |
| 81  | Ashraf, M.; Routray, J. K. (2013). <i>Perception</i>                                                                                                                                              | 2014 | Environmental Change                                        | 2009  | 1 | 103 | Ghana           | 10 |
| 82  | Saha, P. K.; Ghosh, P. K. (2013). <i>Perception</i>                                                                                                                                               | 2013 | International Journal of Disaster Risk Reduction            | 2011  | 3 | 303 | Pakistan        | 20 |
| 83  | A.; Tiwari, K. R.; Bola, G.; Mabiza, C.; Goldin, J.; Kujinga, K.; Brewer, T. D. (2013). <i>Dominant discourses,</i>                                                                               | 2013 | Traditional Knowledge Physics and Chemistry of the Earth    |       | 3 | 303 | Nepal           | 30 |
| 84  | Rodwell, L. D.; Gibb, R. (2009). <i>Collapse and</i>                                                                                                                                              | 2013 | Marine Policy                                               | 2010  | 6 | 603 | Zimbabwe        | 10 |
| 85  | Bunce, M.; Rosewell, S.; Brown, K. (2010). <i>Perceptions of climate</i>                                                                                                                          | 2009 | Global Environmental Change                                 | 2006  | 1 | 107 | Solomon Islands | 10 |
| 86  | S.; Brown, K. (2010). <i>Perceptions of climate</i>                                                                                                                                               | 2010 | Development and Sustainability                              | 2008  | 1 | 104 | Rodrigues       | 10 |
| 87  | Lambin, E. F.; Mayaux, P. (2011). <i>Between</i>                                                                                                                                                  | 2010 | Development and Sustainability                              | 2008  | 1 | 106 | Tanzania        | 10 |
| 88  | Indigenous knowledge and the desertification                                                                                                                                                      | 2011 | Association of American Geographers                         | 2006  | 1 | 103 | Mozambique      | 10 |
| 89  | Fienup-Riordan, A.; Carmack, E. (2011). <i>Understanding</i>                                                                                                                                      | 2005 | Geoforum                                                    | 2006- | 1 | 101 | Senegal         | 10 |
| 90  | Sundberg, J.; Ostwald, M.; Chen, D.; Yun, X.; Koedam, N.; Ruiz Luna, A.; M. Troell, M.; Berrang-Ford, L.; Zavaleta, C.; Carcamo, C.; Llanos E.; Carhuaz, <i>Understanding indigenous people's</i> | 2011 | Oceanography                                                | 2010  | 4 | 801 | Morocco         | 20 |
| 91  | Habiba, U.; Shaw, R.; Takeuchi, Y. (2012). <i>Global Health Action</i>                                                                                                                            | 2011 | Oceanography                                                | 2010  | 4 | 801 | Canada          | 50 |
| 92  | Haden, V. R.; Niles, M. T.; Lubell, M.; Perlman, J.; Jackson, L. E. (2012). <i>Global and Local Concerns about Climate Change</i>                                                                 | 2011 | Global Health Action International Journal of Disaster Risk | 2009  | 2 | 801 | Sweden          | 50 |
| 93  | Sundberg, J.; Ostwald, M.; Chen, D.; Yun, X.; Koedam, N.; Ruiz Luna, A.; M. Troell, M.; Berrang-Ford, L.; Zavaleta, C.; Carcamo, C.; Llanos E.; Carhuaz, <i>Understanding indigenous people's</i> | 2011 | International Journal of Disaster Risk                      | 2010  | 3 | 303 | Bangladesh      | 10 |
| 94  | Sundberg, J.; Ostwald, M.; Chen, D.; Yun, X.; Koedam, N.; Ruiz Luna, A.; M. Troell, M.; Berrang-Ford, L.; Zavaleta, C.; Carcamo, C.; Llanos E.; Carhuaz, <i>Understanding indigenous people's</i> | 2012 | Global and Local Concerns about Climate Change              | 2011  | 4 | 401 | USA             | 20 |
| 95  | Sundberg, J.; Ostwald, M.; Chen, D.; Yun, X.; Koedam, N.; Ruiz Luna, A.; M. Troell, M.; Berrang-Ford, L.; Zavaleta, C.; Carcamo, C.; Llanos E.; Carhuaz, <i>Understanding indigenous people's</i> | 2005 | Climate Change                                              |       | 3 | 304 | China           | 20 |
| 96  | Luna, A.; M. Troell, M.; Berrang-Ford, L.; Zavaleta, C.; Carcamo, C.; Llanos E.; Carhuaz, <i>Understanding indigenous people's</i>                                                                | 2005 | Ecology and Society                                         | 2001  | 4 | 402 | Mexico          | 20 |
| 97  | D.; Berrang-Ford, L.; Zavaleta, C.; Carcamo, C.; Llanos E.; Carhuaz, <i>Understanding indigenous people's</i>                                                                                     | 2013 | Mitigation and Adaptation Strategies for Global Change      |       | 5 | 502 | Peru            | 10 |
| 98  | <i>Understanding indigenous people's</i>                                                                                                                                                          | 2013 | Natural Hazards                                             | 2011  | 3 | 303 | Bangladesh      | 10 |
| 99  | Rosales, J. (2013). <i>Identifying the</i>                                                                                                                                                        | 2013 | Climatic Change                                             | 2009- | 4 | 801 | USA             | 50 |
| 100 | Motaleb, M. A. (2011). <i>Reading Nature's Mind:</i>                                                                                                                                              | 2011 | Indian Journal of Traditional Knowledge                     | 2010  | 3 | 303 | Bangladesh      | 10 |

|     |                                                                                                                         |      |                                                        |            |   |     |                        |    |
|-----|-------------------------------------------------------------------------------------------------------------------------|------|--------------------------------------------------------|------------|---|-----|------------------------|----|
| 101 | Jacob, C.; McDaniels, T.; Hinch, S. (2010). <i>Indigenous culture and</i>                                               | 2010 | Mitigation and Adaptation Strategies for Global Change | 2005       | 4 | 801 | Canada                 | 50 |
| 102 | Kalanda-Joshua, M.; Ngongondo, C.; Chipeta, L.; Mpembeka, Knopp, J. A. (2010).                                          | 2011 | Physics and Chemistry of the Earth                     | 2008-      | 1 | 106 | Malawi                 | 10 |
| 103 | <i>Investigating the Perceptions of environmental change</i> (2007). <i>Pacific walruses, indigenous</i>                | 2010 | Infonorth                                              | 2010       | 4 | 801 | Canada                 | 50 |
| 104 | Guillen, E. (2011). <i>Traditional way of thinking and prediction</i>                                                   | 2000 | Land Degradation and Development                       | 1997-1998  | 4 | 402 | Mexico                 | 10 |
| 105 | Leonard, S.; Parsons, M.; Olawsky, K.; Kofod, F. (2013). <i>The role of</i>                                             | 2007 | Deep-Sea Research                                      | 1999-2004  | 4 | 801 | USA                    | 50 |
| 106 | Li, C.; Tang, Y.; Luo, H.; Di, B.; Zhang, L. (2013). Safi, A. S. 2014.                                                  | 2011 | Indian Journal of Traditional Knowledge                | 2009       | 6 | 603 | New Caledonia (France) | 10 |
| 107 | <i>Rancher and farmer</i>                                                                                               | 2013 | Global Environmental Change                            | 2008-2011  | 6 | 601 | Australia              | 20 |
| 108 | S.; Perret, S. R.; Kazama, F. (2011). Marschke, M.; Lykhim, O.; Kim, N. (2014). <i>Can</i>                              | 2013 | Environmental Management                               | 2010       | 3 | 304 | China                  | 50 |
| 109 | <i>Local Institutions Help</i>                                                                                          | 2014 | Climatic Change                                        | 2009-2010  | 4 | 401 | USA                    | 20 |
| 110 | Diouf, A.; Rasmussen, K.; Reenberg, A. McCarthy, A.; Hepburn, C.; Scott, N.;                                            | 2011 | Environmental Change                                   | 2008       | 3 | 303 | Nepal                  | 50 |
| 111 | Harper, S. L.; Willox, A. C.; Edge, V. L.; Rigolet Jolly, D.; Snow, N. B. (2004). <i>Climate</i>                        | 2014 | Sustainability                                         | 1998-2012  | 3 | 302 | Cambodia               | 10 |
| 112 | Kalanda-Joshua, M.; Ngongondo, C.; Monjerezi, M.;                                                                       | 2008 | Global and Planetary Change                            | 2007-      | 1 | 102 | Senegal                | 20 |
| 113 | W.; Zhen-huan, L.; Verburg, P. H.; Tian, X.; Rana, R. S.; Bhagat, R. M.; Kalia, V.; Lal, H.;                            | 2014 | Aquatic Conservation: Marine and                       | 2009       | 6 | 602 | New Zealand            | 40 |
| 114 | Chavero, E. L. (2011). <i>Indigenous perception</i>                                                                     | 2013 | Global Environmental Change                            | 2010       | 4 | 801 | Canada                 | 50 |
| 115 | Singh, R. K.; Bhowmik, S. N.; Pandey C. B.                                                                              | 2004 | Arctic                                                 | 1999-2001  | 4 | 401 | Canada                 | 50 |
| 116 | Opolanza, G. N.; Ambenje, P.; Wiesmann, U.; Makali, varadan, K. J.; Kumar, P. (2014). <i>Indigenous knowledge about</i> | 2014 | Physics and Chemistry of the Earth                     | 2012       | 3 | 304 | China                  | 40 |
| 117 | Dominey-Howes, D.; Thomalla, F.; Houston, (2000). <i>Farmers Perception of Vegetation Changes in</i>                    | 2013 | Indian Journal of Traditional Knowledge                | 1995-1996, | 3 | 303 | India                  | 30 |
| 118 |                                                                                                                         | 2011 | Climatic Change                                        |            | 4 | 402 | Mexico                 | 10 |
| 119 |                                                                                                                         | 2011 | Indian Journal of Traditional Knowledge                |            | 3 | 303 | India                  | 10 |
| 120 |                                                                                                                         | 2010 | Climatic Change                                        | 2001-2004  | 1 | 104 | Kenya                  | 20 |
| 121 |                                                                                                                         | 2014 | Indian Journal of Traditional Knowledge                | 2012       | 3 | 303 | India                  | 10 |
| 122 |                                                                                                                         | 2013 | Global Environmental Change                            | 2007-2009  | 6 | 601 | Australia              | 10 |
| 123 |                                                                                                                         | 2000 | Land Degradation & Development                         | 1995-1996  | 1 | 102 | Niger                  | 20 |

Data\_Matrix

|     |                                                                    |      |                             |           |   |     |        |    |
|-----|--------------------------------------------------------------------|------|-----------------------------|-----------|---|-----|--------|----|
| 125 | Winnick, R. C.; Harper, C. L.; Ford, J. D.; Landman, K.; Houle, K. | 2012 | Social Science & Medicine   | 2009-2010 | 4 | 801 | Canada | 50 |
| 126 | Winnick, R. C.; Harper, C. L.; Edge, V. L.; Landman, K.; Houle, K. | 2013 | Emotion, Space and Society  | 2009-2010 | 4 | 801 | Canada | 50 |
| 127 | T. (2013). <i>Values, climate change, and</i>                      | 2013 | Global Environmental Change | 2009-2010 | 4 | 801 | Canada | 50 |

Data\_Matrix

| Liv_1 | Liv_2 | Liv_3 | Sample | Method | Goal_<br>perc | Goal_<br>chang | Goal_sci | Type_c<br>hang_1 | Type_c<br>hang_2 | Type_<br>chang<br>_3 | Type_c<br>hang_4 | Type_c<br>hang_5 | Type_c<br>hang_6 |
|-------|-------|-------|--------|--------|---------------|----------------|----------|------------------|------------------|----------------------|------------------|------------------|------------------|
| .     | .     | .     | 250    | 3      | 2             | 3              | 2        | 1                | 10               | 15                   | 2                | 8                | .                |
| 3     | 6     | .     | .      | 3      | 2             | 3              | 2        | 1                | 2                | 10                   | 17               | .                | .                |
| 2     | 5     | 6     | 90     | 3      | 2             | 3              | 2        | 1                | 2                | 10                   | 15               | 8                | .                |
| 6     | 2     | .     | 194    | 3      | 2             | 3              | 2        | 3                | 2                | 15                   | 8                | 1                | 10               |
| 2     | 7     | 6     | .      | 2      | 2             | 1              | 3        | 2                | 9                | 1                    | 15               | 3                | .                |
| 3     | .     | .     | 58     | 2      | 1             | 2              | 2        | 2                | 15               | 17                   | .                | .                | .                |
| 3     | 2     | 7     | 58     | 3      | 1             | 3              | 3        | 2                | 1                | 14                   | 15               | 8                | .                |
| 1     | 7     | .     | 231    | 3      | 2             | 2              | 3        | 17               | 15               | 10                   | .                | .                | .                |
| 1     | 4     | .     | .      | 2      | 3             | .              | 3        | 1                | 4                | 10                   | 15               | 6                | 8                |
| 1     | 4     | .     | .      | 2      | 2             | 3              | 2        | 1                | 10               | 5                    | .                | .                | .                |
| .     | .     | .     | .      | 2      | 3             | .              | 3        | .                | .                | .                    | .                | .                | .                |
| 1     | 4     | 5     | 35     | 3      | 2             | 2              | 2        | 2                | 15               | 1                    | 10               | 8                | .                |
| 1     | 7     | .     | 258    | 3      | 2             | 2              | 3        | 10               | 1                | 2                    | 4                | .                | .                |
| 1     | 5     | 6     | 65     | 2      | 3             | 3              | 3        | 1                | 2                | 10                   | 14               | 15               | .                |
| 1     | 7     | .     | 40     | 2      | 2             | 3              | 3        | 10               | 14               | 15                   | 12               | .                | .                |
| 1     | 7     | .     | 104    | 2      | 2             | 2              | .        | 1                | 10               | 12                   | 14               | 15               | .                |
| 1     | 7     | .     | 105    | 2      | 2             | 3              | 3        | 2                | 10               | 14                   | 15               | .                | .                |
| 1     | 7     | .     | .      | 2      | 3             | 3              | .        | 1                | 10               | 14                   | 6                | 4                | .                |
| 1     | 4     | .     | .      | 2      | 2             | 2              | 2        | 10               | 12               | 15                   | 1                | .                | .                |
| 1     | .     | .     | 35     | 3      | 2             | 2              | 2        | 12               | 10               | 14                   | .                | .                | .                |
| .     | .     | .     | .      | 2      | 2             | 2              | 2        | 12               | 10               | 15                   | 1                | 16               | 16               |
| 1     | 4     | 5     | 8      | 2      | 3             | 3              | 3        | 1                | 10               | 8                    | 13               | 16               | .                |
| 1     | .     | .     | .      | 3      | 3             | 2              | 1        | 10               | 16               | 1                    | .                | .                | .                |
| .     | .     | .     | 134    | 3      | 2             | .              | 2        | 1                | 10               | 2                    | 17               | .                | .                |
| 1     | 4     | 8     | 27     | 3      | 2             | 1              | 2        | 17               | 10               | 4                    | 8                | 17               | .                |
| 6     | .     | .     | 22     | 2      | 1             | 3              | 3        | 8                | .                | .                    | .                | .                | .                |
| 6     | .     | .     | .      | 2      | 1             | 3              | .        | 1                | 2                | 17                   | .                | .                | .                |
| 6     | .     | .     | .      | 3      | 2             | 1              | 3        | 1                | 17               | 8                    | 16               | .                | .                |

Data\_Matrix

|   |   |   |      |   |   |   |   |    |    |    |    |    |   |
|---|---|---|------|---|---|---|---|----|----|----|----|----|---|
| 6 | 1 | 4 | 18   | 3 | 2 | 2 | 3 | 8  | .  | .  | .  | .  | . |
| 6 | 4 | . | .    | 3 | 2 | 1 | 3 | 17 | 8  | 17 | .  | .  | . |
| 4 | 1 | 2 | .    | 3 | 2 | 3 | 1 | 14 | 5  | 15 | 2  | 12 | 3 |
| 4 | 7 | . | 87   | 3 | 2 | 2 | 2 | 2  | 13 | 6  | 4  | 1  | . |
| 5 | 7 | . | 461  | 2 | 1 | 3 | . | 7  | 4  | 8  | 14 | 5  | . |
| 3 | 6 | 6 | 23   | 2 | 1 | . | . | 16 | 3  | 14 | .  | .  | . |
| 1 | 4 | 2 | .    | 2 | 1 | 3 | . | 16 | 15 | 16 | 4  | .  | . |
| . | . | . | 21   | 2 | 1 | 3 | 3 | 8  | 1  | 14 | 17 | .  | . |
| 6 | . | . | 15   | 3 | 3 | 3 | 3 | 17 | .  | .  | .  | .  | . |
| 4 | 2 | 5 | .    | 2 | 3 | 3 | . | 4  | 9  | .  | .  | .  | . |
| 4 | . | . | 75   | 3 | 2 | 2 | 1 | 8  | 6  | 17 | .  | .  | . |
| . | . | . | 146  | 2 | 2 | . | 3 | 1  | 2  | 4  | 6  | 5  | . |
| 4 | . | . | 146  | 3 | 2 | . | 3 | 1  | 2  | 3  | 4  | 6  | 8 |
| 1 | 4 | . | 1    | 2 | 1 | 3 | 3 | 16 | 2  | 15 | 8  | 10 | . |
| 3 | 7 | 6 | 70   | 2 | 2 | 2 | 3 | 1  | 2  | 3  | 9  | 15 | . |
| 6 | . | . | 284  | 1 | 1 | 3 | 3 | 17 | .  | .  | .  | .  | . |
| 6 | . | . | 160  | 2 | 3 | 3 | . | 8  | 7  | 15 | .  | .  | . |
| 6 | . | . | 51   | 3 | 2 | 2 | 2 | 3  | 2  | 15 | 14 | .  | . |
| 2 | 6 | . | 299  | 3 | 3 | . | . | 2  | .  | .  | .  | .  | . |
| 2 | 6 | . | 800  | 1 | 2 | 3 | 3 | 1  | 2  | 15 | .  | .  | . |
| 2 | 6 | . | 1000 | 1 | 2 | 3 | 3 | 1  | 2  | 15 | .  | .  | . |
| 2 | 6 | . | 1000 | 1 | 2 | . | . | 1  | 2  | .  | .  | .  | . |
| 2 | 6 | . | 1000 | 1 | 2 | . | . | 1  | 2  | .  | .  | .  | . |
| 6 | . | . | 53   | 3 | . | 2 | . | .  | .  | .  | .  | .  | . |



Data\_Matrix

|   |   |   |     |   |   |   |   |    |    |    |    |    |    |
|---|---|---|-----|---|---|---|---|----|----|----|----|----|----|
| 2 | . | . | 480 | 3 | 2 | 2 | 2 | 2  | 15 | 3  | 5  | 14 | .  |
| 6 | . | . | 300 | 3 | 1 | 2 | . | 2  | 3  | 17 | 8  | 4  | 17 |
| 2 | 6 | . | 120 | 1 | 1 | 3 | . | 2  | 3  | 8  | 1  | 7  | .  |
| 2 | . | . | 149 | 2 | 2 | 3 | 2 | 2  | 15 | 3  | 7  | .  | .  |
| 3 | 2 | 6 | 366 | 3 | 2 | 3 | 3 | 2  | 3  | 15 | .  | .  | .  |
| 3 | 5 | 2 | .   | 2 | 3 | . | . | 17 | .  | .  | .  | .  | .  |
| 6 | 2 | . | 168 | 3 | 2 | 3 | . | 17 | 8  | 3  | .  | .  | .  |
| 2 | . | . | 200 | 3 | 1 | . | . | 7  | 1  | 2  | 3  | 15 | 5  |
| 2 | 3 | . | 150 | 1 | 2 | 3 | 2 | 1  | 2  | 3  | 15 | .  | .  |
| 2 | 5 | 6 | 57  | 3 | 2 | 1 | 2 | 8  | 11 | 7  | .  | .  | .  |
| 2 | 5 | 4 | 57  | 3 | 2 | 3 | 2 | 8  | 11 | 7  | 2  | .  | .  |
| 7 | 2 | 6 | 50  | 3 | 2 | 2 | 2 | 2  | 12 | 16 | 1  | 3  | 5  |
| 2 | 6 | 5 | .   | 1 | 2 | 2 | 3 | 8  | 7  | 3  | .  | .  | .  |
| 2 | 6 | 8 | 121 | 3 | 2 | 3 | 2 | 2  | 3  | 15 | .  | .  | .  |
| 2 | 6 | 5 | .   | 3 | 2 | 1 | 3 | 8  | 7  | 9  | .  | .  | .  |
| 2 | 5 | 8 | 51  | 3 | 2 | 2 | 2 | 17 | 9  | 11 | 8  | .  | .  |
| 2 | 6 | . | 50  | 3 | 2 | 3 | 2 | 7  | 2  | 8  | 17 | .  | .  |
| 2 | 6 | 4 | .   | 2 | 3 | . | . | 3  | 5  | 13 | .  | .  | .  |
| 2 | . | . | .   | 3 | 2 | . | . | 1  | 14 | 2  | 5  | 17 | .  |
| 2 | 6 | . | .   | 2 | 1 | 3 | 3 | 1  | 2  | 15 | 8  | 12 | 14 |
| 2 | 5 | 6 | 95  | 2 | 2 | 2 | 3 | 17 | 17 | 1  | 3  | .  | .  |
| 2 | 1 | 4 | .   | 3 | 2 | 2 | 2 | 7  | 8  | .  | .  | .  | .  |
| 2 | 4 | 5 | .   | 2 | 2 | 3 | 3 | 2  | 11 | 7  | 1  | 15 | .  |

Data\_Matrix

|   |   |   |      |   |   |   |   |    |    |    |    |    |    |
|---|---|---|------|---|---|---|---|----|----|----|----|----|----|
| 2 | . | . | .    | 3 | 2 | 2 | 2 | 1  | 2  | 3  | 17 | .  | .  |
| 4 | . | . | 209  | 1 | 1 | 3 | 2 | 8  | .  | .  | .  | .  | .  |
| 4 | . | . | 93   | 3 | 1 | 3 | . | 8  | 3  | 4  | 7  | .  | .  |
| 2 | 4 | 7 | 156  | 3 | 1 | 3 | . | .  | .  | .  | .  | .  | .  |
| 4 | . | . | 122  | 2 | 1 | . | . | 1  | 2  | 15 | 7  | 17 | .  |
| 3 | 6 | 7 | 215  | 1 | 1 | 2 | 2 | 1  | 2  | 15 | 3  | 7  | .  |
| 2 | . | . | .    | 3 | 2 | 2 | 2 | 1  | 2  | 15 | 12 | 8  | 4  |
| 2 | 6 | 7 | 144? | 3 | 2 | 2 | 2 | 2  | 3  | 5  | .  | .  | .  |
| 4 | 7 | . | 119  | 3 | 2 | 3 | 2 | 8  | .  | .  | .  | .  | .  |
| 4 | 2 | 8 | 143  | 3 | 2 | 2 | 2 | 3  | 4  | 14 | 7  | .  | .  |
| 2 | 4 | 8 | 49   | 2 | 1 | 2 | 3 | 1  | 2  | 5  | 8  | 4  | 13 |
| 2 | 4 | 8 | 41   | 2 | 1 | 2 | 3 | 1  | 2  | 5  | 8  | 4  | 13 |
| 4 | 2 | 8 | .    | 3 | 2 | 2 | 2 | 2  | 8  | 3  | .  | .  | .  |
| 6 | . | . | 40   | 3 | 2 | 2 | 2 | .  | .  | .  | .  | .  | .  |
| 4 | 1 | . | .    | 2 | 1 | 2 | . | 1  | 10 | 15 | 8  | 17 | .  |
| 6 | 1 | 4 | 14   | 2 | 1 | . | . | 15 | 1  | 8  | 16 | .  | .  |
| 3 | 6 | 7 | 718  | 1 | 1 | 3 | 3 | 1  | 2  | 3  | 17 | .  | .  |
| 3 | 6 | . | 162  | 3 | 1 | 3 | . | 1  | 2  | 17 | 3  | .  | .  |
| 2 | 7 | 6 | .    | 3 | 2 | 2 | 2 | 1  | 2  | .  | .  | .  | .  |
| 3 | 4 | 5 | 54   | 3 | 2 | 2 | 2 | 7  | .  | .  | .  | .  | .  |
| 4 | 1 | 2 | .    | 2 | 2 | 3 | 3 | 7  | 8  | .  | .  | .  | .  |
| 3 | 7 | 8 | 384  | 1 | 1 | . | 2 | 1  | 2  | 16 | 15 | .  | .  |
| 1 | 4 | . | .    | 3 | 1 | . | 3 | 16 | 15 | 14 | 13 | 10 | 2  |
| 2 | 6 | . | 62   | 3 | 3 | . | . | 1  | 2  | 3  | 5  | 14 | 16 |

Data\_Matrix

|   |   |   |     |   |   |   |   |    |    |    |    |    |    |
|---|---|---|-----|---|---|---|---|----|----|----|----|----|----|
| 1 | 4 | 5 | 24  | 2 | 2 | . | . | 8  | 15 | 1  | 2  | 16 | .  |
| 2 | . | . | 218 | 3 | 2 | 2 | 2 | 2  | 16 | 14 | 15 | 3  | 5  |
| . | . | . | .   | 3 | 2 | 2 | . | 16 | 10 | 15 | 9  | .  | .  |
| . | . | . | 40  | 3 | 1 | 3 | . | 17 | 6  | 7  | 8  | .  | .  |
| 1 | . | . | .   | 2 | 2 | 3 | 3 | 10 | 8  | .  | .  | .  | .  |
| . | . | . | 61  | 3 | 1 | 3 | 3 | 1  | 12 | 14 | 6  | 10 | 5  |
| 1 | 4 | 5 | .   | 2 | 2 | . | . | 1  | 8  | 2  | .  | .  | .  |
| 2 | . | . | 71  | 3 | 2 | 2 | 2 | 1  | 15 | 10 | .  | .  | .  |
| 3 | 6 | 7 | 481 | 3 | 1 | . | 3 | 1  | 2  | 3  | .  | .  | .  |
| 2 | 3 | 8 | .   | 3 | 2 | 2 | 2 | 12 | 2  | 1  | 16 | 9  | 15 |
| 4 | 7 | . | .   | 3 | 2 | 3 | 3 | 8  | 17 | 16 | 15 | 1  | 2  |
| 2 | . | . | .   | 3 | 2 | 2 | 2 | 2  | 4  | 16 | 3  | .  | .  |
| . | 4 | . | 100 | 3 | 1 | . | . | 8  | 17 | .  | .  | .  | .  |
| 7 | 1 | 4 | 20  | 2 | 1 | . | . | 15 | 10 | 1  | 8  | .  | .  |
| . | . | . | 16  | 2 | 1 | 3 | 3 | 1  | 10 | 15 | 8  | 12 | 2  |
| 2 | 6 | . | 64  | 3 | 2 | 2 | 2 | 1  | 2  | 16 | 15 | 3  | 12 |
| 3 | 2 | . | 384 | 3 | 2 | 2 | 2 | 1  | 2  | 13 | 12 | 3  | .  |
| 3 | 2 | 7 | 200 | 3 | 2 | 2 | 2 | 15 | 1  | 2  | 16 | .  | .  |
| 2 | 6 | . | 69  | 3 | 1 | 3 | 2 | 1  | 2  | 15 | 16 | 8  | .  |
| 2 | 1 | 5 | 700 | 3 | 2 | 3 | 3 | 15 | 16 | 8  | 4  | 2  | 5  |
| 2 | 6 | . | 127 | 1 | 2 | 2 | 2 | 8  | 16 | .  | .  | .  | .  |
| 2 | 6 | . | 200 | 3 | 2 | 3 | 2 | 2  | 16 | 1  | 15 | 3  | .  |
| 1 | 2 | . | 10  | 2 | 1 | . | . | 12 | 4  | .  | .  | .  | .  |
| 2 | 6 | 5 | 284 | 3 | 1 | 3 | 3 | 8  | 7  | 9  | .  | .  | .  |

# Data\_Matrix

|   |   |   |     |   |   |   |   |   |    |    |    |   |   |
|---|---|---|-----|---|---|---|---|---|----|----|----|---|---|
| 1 | 4 | 7 | 184 | 3 | 1 | . | . | 2 | 10 | 13 | 15 | 8 | . |
| 1 | 4 | 7 | 57  | 3 | 1 | . | . | 2 | 10 | 15 | 1  | . | . |
| 7 | 1 | 4 | 53  | 2 | 1 | . | . | 1 | 10 | 15 | .  | . | . |

Data\_Matrix

| Type_c<br>hang_7 | Length_<br>rec            | Length_<br>perc | Spat_<br>imp | Spat_<br>driver | Driver | Change<br>_eval | Change<br>_inv | Imp_<br>liv | Imp_<br>cult | Imp_<br>envir | Local_<br>conc | Local_<br>psy | Conc_<br>sci | Own_<br>sci | Loc_<br>resp |
|------------------|---------------------------|-----------------|--------------|-----------------|--------|-----------------|----------------|-------------|--------------|---------------|----------------|---------------|--------------|-------------|--------------|
| .                | .                         | 2000s           | .            | .               | .      | .               | 2              | 1           | .            | 1             | .              | .             | 1            | 0           | 0            |
| .                | 1960s                     | 1990s           | 1            | 1               | 3      | 0               | 2              | 1           | .            | 1             | 1              | 0             | 1            | 0           | 1            |
| .                | .                         | .               | 1            | 1               | 3; 1   | 2               | 2              | 1           | .            | 1             | 1              | 1             | 1            | 0           | 0            |
| .                | 1960s                     | 1990s           | .            | 3               | .      | 0               | 2              | 1           | .            | 1             | 0              | 0             | 1            | 0           | 1            |
| .                | .                         | .               | 3            | 3               | 1      | 0               | 1              | 1           | .            | 1             | 0              | 1             | .            | 0           | 1            |
| .                | 1960s                     | 1990s           | .            | .               | 1      | 0               | 2              | 1           | 1            | 1             | 1              | 1             | 2            | 0           | 1            |
| .                | 1960s                     | 1970s           | .            | .               | .      | 0               | 2              | 1           | .            | 1             | 1              | 1             | 2            | 0           | 1            |
| .                | 1980s                     | .               | .            | .               | .      | 2               | 2              | 1           | .            | .             | 0              | 0             | .            | 0           | 0            |
| 5                | .                         | .               | 3            | 3               | 1      | 0               | 2              | 1           | 1            | 1             | 1              | 0             | 1            | 0           | 1            |
| .                | 1900s                     | .               | .            | .               | .      | 0               | 2              | 1           | 1            | 1             | 1              | 0             | 2            | 0           | .            |
| .                | .                         | .               | .            | .               | .      | 0               | 2              | 1           | 1            | 1             | 1              | 1             | .            | 0           | 0            |
| .                | 1940s                     | .               | .            | .               | .      | 0               | 2              | 1           | 1            | .             | 1              | 1             | 2            | 0           | 1            |
| .                | .                         | .               | .            | .               | .      | .               | 2              | 1           | .            | 1             | 0              | 0             | .            | 0           | 0            |
| .                | .                         | .               | .            | .               | .      | .               | 2              | 1           | .            | 1             | 1              | 0             | 1            | 0           | 1            |
| .                | .                         | .               | .            | .               | .      | 0               | 2              | 1           | 1            | 1             | 0              | 0             | .            | 0           | 1            |
| .                | .                         | .               | .            | .               | .      | 0               | 2              | 1           | 1            | 1             | 0              | 0             | .            | 0           | 1            |
| .                | .                         | .               | .            | .               | .      | 0               | 2              | 1           | 1            | 1             | 0              | 0             | 1            | 0           | 1            |
| .                | .                         | .               | .            | .               | .      | 0               | 2              | 1           | 1            | 1             | .              | .             | .            | 0           | 1            |
| .                | .                         | 1990s           | .            | .               | .      | .               | 2              | 1           | 1            | 1             | 0              | 0             | .            | 0           | 1            |
| .                | 1970s<br>1950s,<br>1970s, | 1960s,<br>1990s | .            | .               | .      | 0               | 2              | 1           | .            | 1             | 1              | 1             | 2            | 0           | 1            |
| 17               | .                         | .               | .            | .               | .      | .               | 2              | .           | .            | 1             | 1              | 1             | 2            | 0           | 0            |
| .                | .                         | 1990s           | .            | .               | .      | 0               | 2              | 1           | .            | 1             | 1              | 1             | 1            | 0           | 1            |
| .                | 1950s                     | 1990s           | .            | .               | .      | 0               | 2              | 1           | 1            | 1             | 1              | 1             | 2            | 0           | 1            |
| .                | .                         | .               | .            | .               | .      | .               | 2              | .           | .            | .             | 0              | 1             | 2            | 0           | 0            |
| .                | .                         | .               | .            | .               | 1      | .               | 2              | .           | .            | 1             | 1              | 0             | 2            | 0           | 0            |
| .                | .                         | .               | 2            | 1               | 1      | 0               | 1              | 1           | .            | 1             | 1              | 0             | .            | 0           | 0            |
| .                | .                         | .               | .            | .               | .      | .               | .              | 1           | .            | .             | 0              | 0             | .            | 0           | 1            |
| .                | .                         | .               | .            | .               | 1      | 2               | 2              | 1           | 1            | 1             | 1              | 0             | .            | 1           | 1            |

Data\_Matrix

|    |       |       |   |   |      |   |   |   |   |   |   |   |   |   |   |
|----|-------|-------|---|---|------|---|---|---|---|---|---|---|---|---|---|
| .  | .     | .     | . | . | 1    | 2 | 2 | 1 | . | 1 | 1 | 0 | . | 0 | 1 |
| .  | 1980s | .     | . | . | 1    | 2 | 2 | 1 | . | 1 | 0 | 0 | 2 | 1 | 1 |
| 7  | 1950s | .     | 1 | . | .    | . | 2 | 1 | . | . | 1 | 1 | 2 | 0 | 1 |
| .  | 1970s | .     | . | . | .    | . | 2 | 1 | . | 1 | 0 | 1 | 1 | 0 | 0 |
| .  | .     | .     | . | 1 | 1    | . | 1 | . | . | . | 0 | 1 | . | 0 | 0 |
| .  | .     | .     | 3 | 3 | 1    | 2 | 1 | 1 | . | . | 0 | 0 | . | 0 | 1 |
| .  | .     | 2000s | . | . | .    | . | 1 | . | . | . | 1 | 0 | . | 0 | 0 |
| .  | .     | .     | 3 | 3 | 1    | 0 | 1 | . | . | . | 1 | 1 | . | 0 | 1 |
| .  | .     | .     | 4 | 4 | .    | . | 1 | . | . | . | 0 | 1 | . | 0 | 0 |
| .  | .     | .     | . | . | 2    | . | 1 | . | . | . | 0 | 1 | . | 0 | 1 |
| .  | 1940s | .     | 1 | 1 | .    | . | 2 | . | . | . | 1 | 1 | 2 | 0 | 0 |
| .  | .     | .     | 3 | 3 | 1    | 0 | 1 | . | . | . | 1 | 1 | 2 | 0 | 0 |
| 15 | .     | .     | 3 | 3 | 1    | . | 2 | . | . | 1 | 0 | 1 | 1 | 0 | 0 |
| .  | .     | .     | . | . | 1; 3 | 0 | 1 | 1 | . | 1 | 1 | 0 | . | 0 | 1 |
| .  | .     | 1990s | . | . | .    | 0 | 1 | 1 | . | . | 0 | 0 | . | 0 | 1 |
| .  | .     | 1960s | . | . | .    | 0 | 2 | . | . | . | 0 | 0 | . | 0 | 0 |
| .  | .     | .     | . | . | .    | . | 1 | . | . | . | 1 | 0 | . | 0 | 1 |
| .  | 1980s | 1990s | . | . | .    | 0 | 2 | 1 | . | . | 1 | 1 | 2 | 0 | 0 |
| .  | .     | 2000s | . | . | .    | . | 1 | . | . | . | 0 | 1 | . | 0 | 1 |
| .  | 1960s | 1980s | . | . | .    | . | 2 | . | . | . | 0 | 1 | 2 | 0 | 1 |
| .  | 1950s | 1980s | . | . | .    | . | 2 | . | . | . | 0 | 1 | 1 | 0 | 1 |
| .  | .     | 1980s | . | . | .    | . | 1 | . | . | . | 0 | 0 | . | 0 | 1 |
| .  | .     | 1980s | . | . | .    | . | 1 | . | . | . | 0 | 0 | . | 0 | 1 |
| .  | 1970s | .     | . | . | .    | . | . | 1 | . | . | 0 | 0 | . | 0 | 1 |

Data\_Matrix

|    |       |       |   |   |   |   |   |   |   |   |   |   |   |   |   |
|----|-------|-------|---|---|---|---|---|---|---|---|---|---|---|---|---|
| .  | 1970s | 1990s | . | . | . | . | 2 | 1 | . | . | 0 | 0 | 1 | 0 | 1 |
| 17 | .     | 1970s | . | . | . | 0 | 1 | 1 | . | 1 | 0 | 0 | . | 0 | 1 |
| .  | .     | .     | 3 | 3 | 1 | . | 1 | . | . | . | 0 | 0 | . | 0 | 0 |
| .  | .     | 1980s | . | . | . | 0 | 1 | . | . | . | 0 | 1 | 0 | 0 | 1 |
| .  | .     | .     | . | . | 1 | . | 1 | . | . | . | 1 | 1 | 0 | 0 | 1 |
| .  | .     | 1980s | . | . | . | . | 1 | 1 | . | . | 0 | 0 | . | 0 | 1 |
| .  | .     | .     | . | 1 | 1 | 0 | 1 | 1 | 1 | 1 | 1 | 0 | . | 0 | 1 |
| 17 | .     | .     | . | . | 1 | 0 | 1 | 1 | 1 | 1 | 0 | 0 | . | 0 | 1 |
| .  | 1990s | .     | . | . | . | . | 2 | 1 | . | . | 1 | 1 | 2 | 0 | 1 |
| .  | 1990s | .     | . | . | . | . | 2 | 1 | . | 1 | 0 | 1 | 2 | 1 | 0 |
| .  | 1960s | 1960s | . | . | . | . | 2 | 1 | . | 1 | 1 | 1 | 1 | 1 | 0 |
| 8  | .     | 1960s | . | . | . | 0 | 2 | 1 | 1 | 1 | 0 | 0 | . | 0 | 1 |
| .  | .     | .     | . | . | . | . | 2 | 1 | . | 1 | 0 | 1 | . | 0 | 0 |
| .  | 1980s | 1980s | . | . | 3 | 0 | 2 | 1 | . | . | 1 | 1 | 1 | 0 | 1 |
| .  | .     | .     | . | . | . | . | 2 | 1 | . | . | 0 | 1 | . | 0 | 0 |
| .  | 1970s | 1970s | . | 1 | 1 | . | 2 | . | . | . | 1 | 0 | 1 | 0 | 0 |
| .  | 1990s | 1990s | . | . | 1 | . | 2 | . | . | . | 0 | 0 | 2 | 0 | 0 |
| .  | .     | 1990s | . | . | . | . | 1 | 1 | . | . | 0 | 0 | . | 0 | 1 |
| .  | .     | .     | . | 1 | 3 | . | 2 | 1 | . | . | 1 | 1 | . | 0 | 1 |
| 17 | .     | .     | . | 1 | 3 | 2 | 1 | 1 | . | 1 | 1 | 0 | . | 0 | 1 |
| .  | .     | .     | . | . | 2 | 0 | 1 | 1 | . | . | 1 | 1 | . | 0 | 1 |
| .  | .     | .     | . | 1 | 1 | 0 | 2 | . | . | . | 0 | 1 | 1 | 1 | 0 |
| .  | .     | .     | . | . | . | 0 | 2 | 1 | . | . | 1 | 0 | 1 | 0 | 1 |

Data\_Matrix

|    |       |       |   |   |   |   |   |   |   |   |   |   |   |   |   |
|----|-------|-------|---|---|---|---|---|---|---|---|---|---|---|---|---|
| .  | 1960s | .     | . | . | . | 0 | 2 | 1 | . | . | 1 | 0 | 2 | 0 | 1 |
| .  | 1970s | 1970s | . | . | . | . | 2 | . | . | . | 0 | 1 | . | 0 | 0 |
| .  | .     | .     | . | . | . | 0 | 1 | 1 | . | . | 0 | 1 | . | 0 | 0 |
| .  | .     | .     | . | 4 | . | . | 0 | 1 | . | 1 | 0 | 1 | 0 | 0 | 1 |
| .  | .     | .     | . | 2 | 1 | 2 | 2 | 1 | . | 1 | 1 | . | 2 | 0 | 1 |
| .  | .     | .     | . | . | 3 | 0 | 2 | 1 | . | . | 1 | 1 | 1 | 0 | 1 |
| .  | 1970s | 1980s | . | . | . | 0 | 2 | 1 | . | 1 | 0 | 0 | 2 | 0 | 1 |
| .  | .     | 1990s | . | . | . | 0 | 2 | 1 | . | . | 0 | 0 | 2 | 0 | 1 |
| .  | .     | .     | 1 | 1 | 1 | 0 | 2 | 1 | . | 1 | 1 | 1 | 1 | 0 | 1 |
| .  | .     | 1970s | . | 1 | 1 | 2 | 2 | 1 | 1 | 1 | 1 | 1 | . | 0 | 1 |
| 14 | .     | 1990s | . | 3 | 1 | 0 | 2 | 1 | . | 1 | 0 | 1 | . | 0 | 1 |
| 14 | .     | 1970s | . | 3 | 1 | 0 | 2 | 1 | . | 1 | 0 | 1 | . | 0 | 1 |
| .  | 1980s | 1980s | 1 | 2 | 1 | 2 | 2 | 1 | . | 1 | 0 | 0 | 1 | 0 | . |
| .  | .     | .     | 4 | 4 | . | . | . | . | . | . | 0 | 1 | 1 | 0 | 1 |
| .  | .     | .     | . | 1 | 1 | 0 | 1 | 1 | . | 1 | 1 | 0 | . | 0 | 1 |
| .  | .     | .     | . | . | . | 2 | 2 | 1 | . | 1 | 0 | 1 | 1 | 0 | 1 |
| .  | .     | 1980s | . | . | . | 0 | 2 | 1 | 1 | . | 1 | 1 | 1 | 0 | 1 |
| .  | .     | .     | 3 | 3 | 1 | 0 | 1 | 1 | . | . | 0 | 1 | . | 0 | 1 |
| .  | 1970s | 1980s | . | . | . | . | 2 | 1 | . | . | 0 | 1 | 1 | 0 | 1 |
| .  | .     | .     | 1 | 2 | 1 | . | 1 | . | . | . | 0 | 1 | 0 | 0 | 0 |
| .  | .     | .     | . | 2 | 1 | 0 | 2 | 1 | 1 | 1 | 0 | 0 | . |   | 1 |
| .  | .     | .     | . | . | . | . | 1 | 1 | . | . | 0 | 1 | . | 0 | 0 |
| 12 | .     | .     | . | . | . | 0 | 1 | 1 | . | 1 | 1 | 1 | 1 | 0 | 0 |
| 8  | .     | 2000  | . | . | . | 0 | . | 1 | . | 1 | 0 | 0 | . | 0 | 0 |



Data\_Matrix

|   |       |       |   |   |   |   |   |   |   |   |   |   |   |   |   |   |
|---|-------|-------|---|---|---|---|---|---|---|---|---|---|---|---|---|---|
| . | .     | 1990  | 3 | 3 | 1 | 0 | 1 | 1 | 1 | 1 | 1 | 0 | 1 | 0 | 1 |   |
| 1 | 1970s | .     | . | . | . | 0 | 2 | 1 | . | . | 0 | 0 | 1 | 0 | 0 |   |
| . | .     | 1990s | . | . | . | . | . | 1 | . | . | 0 | 0 | . | 1 | 0 |   |
| . | .     | .     | 1 | 1 | 1 | . | 1 | . | . | 1 | 0 | 0 | . | 0 | 0 |   |
| . | .     | .     | 3 | 3 | . | . | 1 | 1 | 1 | 1 | 1 | 1 | 1 | 1 | 0 | 0 |
| 8 | .     | .     | 3 | 3 | 1 | 0 | . | . | . | . | 1 | 0 | 1 | 0 | 0 |   |
| . | .     | .     | 1 | 1 | 1 | 0 | 1 | 1 | . | . | 1 | 0 | . | 0 | 1 |   |
| . | 1980s | 1980s | . | . | . | . | 2 | 1 | . | . | 0 | 1 | 1 | 0 | 1 |   |
| . | .     | .     | 3 | 3 | 2 | 2 | 2 | . | . | . | 1 | 1 | 0 | 0 | 0 |   |
| . | 1990s | .     | . | . | . | 0 | 2 | 1 | 1 | . | 0 | 1 | 1 | 0 | 1 |   |
| 5 | 1960s | .     | . | . | . | 0 | 2 | 1 | . | . | 0 | 0 | 2 | 0 | 1 |   |
| . | 1980s | 1980s | . | 1 | 1 | 0 | 2 | 1 | . | 1 | 0 | 0 | 1 |   | 1 |   |
| . | 1950s | 1950s | . | 2 | 1 | 0 | 2 | 1 | 1 | 1 | 1 | 1 | 1 | 0 | 1 |   |
| . | .     | .     | . | . | . | 0 | 1 | 1 | 1 | 1 | 0 | 0 | . | 0 | 1 |   |
| . | .     | 1990s | . | . | . | 0 | 1 | 1 | 1 | 1 | 1 | 0 | . | 0 | 0 |   |
| 7 | 1970s | 1990s | 4 | 4 | . | . | 2 | 1 | . | . | 1 | 1 | 2 | 0 | 1 |   |
| . | 1980s | 1980s | . | . | . | 2 | 2 | 1 | . | . | 0 | 1 | 1 | 0 | 1 |   |
| . | 1970s | .     | . | . | . | . | 2 | 1 | . | . | 0 | 0 | 1 | 0 | 1 |   |
| . | 1980s | 1980s | 1 | 1 | 2 | 0 | 2 | 1 | . | . | 1 | 1 | 1 | 0 | 1 |   |
| 1 | .     | 1970s | . | . | . | 0 | 1 | 1 | 1 | . | 1 | 0 | . | 0 | 1 |   |
| . | .     | .     | . | . | 3 | 0 | 1 | 1 | . | . | 1 | 0 | 1 | 0 | 0 |   |
| . | 1990s | .     | . | . | . | 0 | 2 | 1 | . | . | 0 | 0 | 1 | 0 | 1 |   |
| . | .     | .     | . | 1 | 3 | . | 1 | 0 | 0 | 0 | 1 | 1 | . | 0 | 0 |   |
| . | .     | .     | . | . | . | . | 2 | 1 | . | 1 | 0 | 1 | 1 | 0 | 0 |   |

# Data\_Matrix

|   |   |   |   |   |   |   |   |   |   |   |   |   |   |   |   |
|---|---|---|---|---|---|---|---|---|---|---|---|---|---|---|---|
| . | . | . | . | . | . | 0 | . | 1 | 1 | 1 | 1 | 0 | . | 0 | 0 |
| . | . | . | . | . | . | 0 | 2 | 1 | 1 | . | 1 | 1 | . | 0 | 0 |
| . | . | . | . | . | . | 2 | 2 | 1 | 1 | . | 1 | 1 | 1 | 0 | 0 |

| Loc_<br>adap<br>t | Loc_<br>init |
|-------------------|--------------|
|-------------------|--------------|

|   |   |
|---|---|
| . | . |
| 1 | 3 |

|   |   |
|---|---|
| . | . |
|---|---|

|   |   |
|---|---|
| 1 | 1 |
|---|---|

|   |   |
|---|---|
| 3 | 3 |
|---|---|

|   |   |
|---|---|
| 1 | 1 |
|---|---|

|   |   |
|---|---|
| 3 | 1 |
|---|---|

|   |   |
|---|---|
| . | . |
|---|---|

|   |   |
|---|---|
| 3 | 3 |
|---|---|

|   |   |
|---|---|
| . | . |
|---|---|

|   |   |
|---|---|
| . | . |
|---|---|

|   |   |
|---|---|
| 1 | 1 |
|---|---|

|   |   |
|---|---|
| . | . |
|---|---|

|   |   |
|---|---|
| 3 | 3 |
|---|---|

|   |   |
|---|---|
| 3 | 1 |
|---|---|

|   |   |
|---|---|
| 3 | 3 |
|---|---|

|   |   |
|---|---|
| 3 | 3 |
|---|---|

|   |   |
|---|---|
| 3 | 3 |
|---|---|

|   |   |
|---|---|
| 3 | 1 |
|---|---|

|   |   |
|---|---|
| . | 1 |
|---|---|

|   |   |
|---|---|
| . | . |
|---|---|

|   |   |
|---|---|
| 1 | 1 |
|---|---|

|   |   |
|---|---|
| 1 | 1 |
|---|---|

|   |   |
|---|---|
| . | . |
|---|---|

|   |   |
|---|---|
| . | . |
|---|---|

|   |   |
|---|---|
| . | . |
|---|---|

|   |   |
|---|---|
| 3 | 3 |
|---|---|

|   |   |
|---|---|
| 1 | 1 |
|---|---|

|   |   |
|---|---|
| . | 1 |
| 1 | 1 |
| 1 | 3 |
| . | . |
| . | . |
| 3 | 1 |
| . | . |
| 3 | 3 |
| . | . |
| 1 | 1 |
| . | . |
| . | . |
| . | . |
| . | 3 |
| 3 | 1 |
| . | . |
| 3 | 3 |
| . | . |
| 1 | 1 |
| 3 | . |
| 3 | . |
| 1 | 1 |
| 1 | 1 |
| 1 | 1 |

|   |   |
|---|---|
| 1 | 1 |
| 1 | 1 |
| . | . |
| 1 | 1 |
| 1 | 1 |
| 3 | 1 |
| 1 | 1 |
| 1 | 1 |
| 1 | 1 |
| . | . |
| . | . |
| 3 | 3 |
| . | . |
| 3 | 3 |
| . | . |
| . | . |
| . | . |
| 3 | 3 |
| 3 | 3 |
| 3 | 3 |
| 3 | 3 |
| 3 | 3 |
| . | . |
| 3 | 3 |

3 3

. .

. .

3 3

3 1

3 1

1 1

1 3

1 1

2 2

2 2

2 2

. .

2 2

1 1

1 .

3 3

2 1

3 3

. .

1 1

. .

. .

. .

|   |   |
|---|---|
| 1 | 1 |
| . | . |
| . | . |
| . | . |
| . | . |
| . | . |
| 1 | 1 |
| 1 | 1 |
| . | . |
| 3 | 1 |
| 1 | 3 |
| 3 | 3 |
| . | 2 |
| 2 | 1 |
| . | . |
| 1 | 1 |
| 1 | 1 |
| 1 | . |
| 1 | 1 |
| 1 | 1 |
| . | . |
| 3 | 1 |
| . | . |
| . | . |

• •  
• •  
• •
